# Supplementary material for: A Novel Sit4 Phosphatase Complex Is Involved in the Response to Ceramide Stress in Yeast
Source: Hindawi journal article supplement (doi:10.1155/2013/129645), 2013-01-01
Supplement: f1 [file 129645.f1.pdf]

**Supplementary Table 1**

**Figure 2**

| CY4029               | 0 $\mu$ M Ceramide OD <sub>600</sub> | 15 $\mu$ M Ceramide OD <sub>600</sub> | % of untreated growth |
|----------------------|--------------------------------------|---------------------------------------|-----------------------|
|                      | 0.63                                 | 0.03                                  | 4.11                  |
|                      | 0.85                                 | 0.05                                  | 6.10                  |
|                      | 0.87                                 | 0.06                                  | 6.82                  |
|                      | 1.07                                 | 0.01                                  | 0.94                  |
|                      | 1.08                                 | 0.02                                  | 1.94                  |
|                      | 1.08                                 | 0.04                                  | 3.70                  |
|                      | 1.21                                 | 0.00                                  | 0.00                  |
|                      | 1.27                                 | 0.04                                  | 3.39                  |
|                      | 1.48                                 | 0.02                                  | 1.22                  |
|                      | 1.62                                 | 0.36                                  | 22.28                 |
|                      | 1.96                                 | 0.09                                  | 4.69                  |
|                      | 2.07                                 | 0.24                                  | 11.50                 |
|                      | 2.68                                 | 0.23                                  | 8.62                  |
|                      | 2.80                                 | 0.12                                  | 4.18                  |
|                      | 2.94                                 | 0.12                                  | 4.08                  |
|                      | 3.07                                 | 0.04                                  | 1.40                  |
|                      | 3.91                                 | 0.52                                  | 13.30                 |
|                      | -                                    | -                                     | 6.10                  |
|                      | -                                    | -                                     | 7.95                  |
|                      | -                                    | -                                     | 16.07                 |
|                      | -                                    | -                                     | 25.52                 |
| <i>sit4</i> $\Delta$ | 0 $\mu$ M Ceramide OD <sub>600</sub> | 15 $\mu$ M Ceramide OD <sub>600</sub> | % of untreated growth |
|                      | 0.30                                 | 0.21                                  | 68.09                 |
|                      | 0.35                                 | 0.06                                  | 18.34                 |
|                      | 0.41                                 | 0.21                                  | 50.24                 |
|                      | 0.49                                 | 0.14                                  | 28.98                 |
|                      | 0.53                                 | 0.29                                  | 54.37                 |
|                      | 0.55                                 | 0.22                                  | 40.55                 |
|                      | 0.55                                 | 0.31                                  | 55.46                 |
|                      | 0.65                                 | 0.08                                  | 12.31                 |
|                      | 0.65                                 | 0.34                                  | 52.84                 |
|                      | 0.69                                 | 0.26                                  | 37.83                 |
|                      | 0.71                                 | 0.34                                  | 47.69                 |
|                      | 0.82                                 | 0.13                                  | 15.73                 |
|                      | 0.87                                 | 0.07                                  | 8.51                  |
|                      | 1.16                                 | 0.11                                  | 9.40                  |
|                      | 1.88                                 | 0.44                                  | 23.51                 |
|                      | 1.89                                 | 1.39                                  | 73.55                 |
|                      | 3.89                                 | 1.58                                  | 40.62                 |
|                      | -                                    | -                                     | 24.04                 |
|                      | -                                    | -                                     | 26.92                 |
|                      | -                                    | -                                     | 29.02                 |
|                      | -                                    | -                                     | 52.84                 |

| <i>sap</i> $\Delta\Delta\Delta\Delta$         | 0 $\mu$ M Ceramide OD <sub>600</sub> | 15 $\mu$ M Ceramide OD <sub>600</sub> | % of untreated growth |
|-----------------------------------------------|--------------------------------------|---------------------------------------|-----------------------|
|                                               | 0.26                                 | 0.04                                  | 14.51                 |
|                                               | 0.65                                 | 0.32                                  | 49.23                 |
|                                               | 0.79                                 | 0.07                                  | 8.71                  |
|                                               | 0.92                                 | 0.07                                  | 7.61                  |
|                                               | 0.97                                 | 0.12                                  | 12.41                 |
|                                               | 1.13                                 | 0.09                                  | 7.52                  |
|                                               | -                                    | -                                     | 12.41                 |
| <i>sap185</i> $\Delta$                        | 0 $\mu$ M Ceramide OD <sub>600</sub> | 15 $\mu$ M Ceramide OD <sub>600</sub> | % of untreated growth |
|                                               | 1.20                                 | 0.04                                  | 2.92                  |
|                                               | 1.80                                 | 0.02                                  | 1.11                  |
|                                               | 3.42                                 | 0.22                                  | 6.43                  |
|                                               | 4.15                                 | 0.30                                  | 7.13                  |
| <i>sap190</i> $\Delta$                        | 0 $\mu$ M Ceramide OD <sub>600</sub> | 15 $\mu$ M Ceramide OD <sub>600</sub> | % of untreated growth |
|                                               | 0.91                                 | 0.03                                  | 2.75                  |
|                                               | 0.95                                 | 0.03                                  | 3.05                  |
|                                               | 1.81                                 | 0.14                                  | 7.90                  |
| <i>sap4</i> $\Delta$ <i>sap155</i> $\Delta$   | 0 $\mu$ M Ceramide OD <sub>600</sub> | 15 $\mu$ M Ceramide OD <sub>600</sub> | % of untreated growth |
|                                               | 0.67                                 | 0.03                                  | 3.88                  |
|                                               | 0.74                                 | 0.05                                  | 6.76                  |
|                                               | 0.93                                 | 0.33                                  | 35.16                 |
|                                               | 1.54                                 | 0.08                                  | 5.46                  |
|                                               | 1.63                                 | 0.11                                  | 6.50                  |
|                                               | 2.21                                 | 0.15                                  | 6.61                  |
|                                               | 3.02                                 | 0.13                                  | 4.24                  |
| <i>sap185</i> $\Delta$ <i>sap190</i> $\Delta$ | 0 $\mu$ M Ceramide OD <sub>600</sub> | 15 $\mu$ M Ceramide OD <sub>600</sub> | % of untreated growth |
|                                               | 0.47                                 | 0.03                                  | 6.81                  |
|                                               | 0.60                                 | 0.06                                  | 10.33                 |
|                                               | 0.68                                 | 0.03                                  | 5.00                  |
|                                               | 0.69                                 | 0.09                                  | 12.32                 |
|                                               | 0.96                                 | 0.02                                  | 2.47                  |
|                                               | 2.56                                 | 0.10                                  | 3.71                  |
|                                               | 3.02                                 | 0.17                                  | 5.63                  |
| <i>elp1</i> $\Delta$                          | 0 $\mu$ M Ceramide OD <sub>600</sub> | 15 $\mu$ M Ceramide OD <sub>600</sub> | % of untreated growth |
|                                               | 0.64                                 | 0.11                                  | 16.56                 |
|                                               | 0.80                                 | 0.23                                  | 28.50                 |
|                                               | 2.48                                 | 0.22                                  | 8.71                  |
|                                               | -                                    | -                                     | 6.42                  |
|                                               | -                                    | -                                     | 8.25                  |
|                                               | -                                    | -                                     | 24.91                 |

| <i>elp2</i> Δ | 0 μM Ceramide OD <sub>600</sub> | 15 μM Ceramide OD <sub>600</sub> | % of untreated growth |
|---------------|---------------------------------|----------------------------------|-----------------------|
|               | 0.40                            | 0.02                             | 5.82                  |
|               | 0.48                            | 0.03                             | 5.21                  |
|               | 0.67                            | 0.01                             | 2.09                  |
|               | -                               | -                                | 1.53                  |
|               | -                               | -                                | 3.75                  |
|               | -                               | -                                | 4.10                  |

| <i>elp3</i> Δ | 0 μM Ceramide OD <sub>600</sub> | 15 μM Ceramide OD <sub>600</sub> | % of untreated growth |
|---------------|---------------------------------|----------------------------------|-----------------------|
|               | 0.69                            | 0.31                             | 44.20                 |
|               | 1.69                            | 0.10                             | 5.86                  |
|               | 2.80                            | 0.21                             | 7.46                  |
|               | -                               | -                                | 20.50                 |
|               | -                               | -                                | 21.97                 |
|               | -                               | -                                | 43.33                 |

| <i>kti12</i> Δ | 0 μM Ceramide OD <sub>600</sub> | 15 μM Ceramide OD <sub>600</sub> | % of untreated growth |
|----------------|---------------------------------|----------------------------------|-----------------------|
|                | 0.82                            | 0.89                             | 108.54                |
|                | 1.22                            | 0.19                             | 15.25                 |
|                | 1.59                            | 0.66                             | 41.38                 |
|                | -                               | -                                | 10.94                 |
|                | -                               | -                                | 12.31                 |
|                | -                               | -                                | 32.41                 |

| <i>sit4</i> Δ <i>kti12</i> Δ | 0 μM Ceramide OD <sub>600</sub> | 15 μM Ceramide OD <sub>600</sub> | % of untreated growth |
|------------------------------|---------------------------------|----------------------------------|-----------------------|
|                              | 0.40                            | 0.03                             | 7.50                  |
|                              | 0.97                            | 0.01                             | 1.03                  |
|                              | 1.19                            | 0.03                             | 2.52                  |
|                              | 2.00                            | 0.04                             | 2.00                  |

Supplementary Table 2

Figure 3

| OD <sub>600</sub>  |        |                              |        |        |        |        |        |
|--------------------|--------|------------------------------|--------|--------|--------|--------|--------|
| Phytoceramide (μM) |        |                              |        |        |        |        |        |
|                    |        | <b>CY4029</b>                |        |        |        |        |        |
| <b>0</b>           | 0.76   | 0.84                         | 1.51   | 1.59   | 1.99   | 2.76   |        |
| <b>5</b>           | 0.24   | 0.60                         | 0.33   | 0.65   | 1.48   | 1.93   |        |
| <b>10</b>          | 0.02   | 0.11                         | 0.24   | 0.37   | 0.41   | 0.69   |        |
| <b>15</b>          | 0.00   | 0.12                         | 0.23   | 0.33   | 0.41   | 0.74   |        |
|                    |        | <b><i>kti12</i> Δ</b>        |        |        |        |        |        |
| <b>0</b>           | 0.57   | 0.63                         | 1.20   | 1.71   | 2.52   | 2.59   | 2.79   |
| <b>5</b>           | 0.57   | 0.52                         | 1.52   | 2.19   | 2.49   | 2.15   | 2.40   |
| <b>10</b>          | 0.31   | 0.44                         | 0.74   | 0.69   | 2.46   | 2.89   | 2.60   |
| <b>15</b>          | 0.28   | 0.37                         | 0.70   | 0.77   | 2.99   | 2.61   | 2.72   |
|                    |        | <b><i>sit4</i> Δ</b>         |        |        |        |        |        |
| <b>0</b>           | 0.33   | 0.50                         | 0.54   | 0.57   | 0.97   | 1.02   | 1.03   |
| <b>5</b>           | 0.16   | 0.50                         | 0.24   | 0.20   | 1.05   | 0.58   | 1.02   |
| <b>10</b>          | 0.12   | 0.23                         | 0.30   | 0.21   | 0.49   | 0.46   | 0.51   |
| <b>15</b>          | 0.10   | 0.26                         | 0.25   | 0.25   | 0.62   | 0.36   | 0.46   |
|                    |        | <b>% of untreated growth</b> |        |        |        |        |        |
| Phytoceramide (μM) |        |                              |        |        |        |        |        |
|                    |        | <b>CY4029</b>                |        |        |        |        |        |
| <b>0</b>           | 100.00 | 100.00                       | 100.00 | 100.00 | 100.00 | 100.00 |        |
| <b>5</b>           | 30.84  | 71.39                        | 21.92  | 40.94  | 74.37  | 69.93  |        |
| <b>10</b>          | 1.97   | 12.63                        | 15.76  | 23.52  | 20.75  | 24.86  |        |
| <b>15</b>          | 0.00   | 14.42                        | 15.10  | 20.75  | 20.35  | 26.63  |        |
|                    |        | <b><i>kti12</i> Δ</b>        |        |        |        |        |        |
| <b>0</b>           | 100.00 | 100.00                       | 100.00 | 100.00 | 100.00 | 100.00 | 100.00 |
| <b>5</b>           | 100.00 | 83.02                        | 126.67 | 128.07 | 98.81  | 83.01  | 86.02  |
| <b>10</b>          | 54.91  | 69.84                        | 61.67  | 40.47  | 97.62  | 111.58 | 93.19  |
| <b>15</b>          | 49.65  | 58.41                        | 58.08  | 45.26  | 115.08 | 100.77 | 97.49  |
|                    |        | <b><i>sit4</i> Δ</b>         |        |        |        |        |        |
| <b>0</b>           | 100.00 | 100.00                       | 100.00 | 100.00 | 100.00 | 100.00 | 100.00 |
| <b>5</b>           | 47.27  | 99.40                        | 44.90  | 35.31  | 108.15 | 56.86  | 99.12  |
| <b>10</b>          | 34.85  | 46.60                        | 54.73  | 36.36  | 50.67  | 44.71  | 50.15  |
| <b>15</b>          | 29.39  | 51.00                        | 46.01  | 43.18  | 63.88  | 35.10  | 44.88  |

| DHS ( $\mu$ M) | OD <sub>600</sub> |      |      |      |      |      |
|----------------|-------------------|------|------|------|------|------|
|                | CY4029            |      |      |      |      |      |
| 0              | 0.76              | 1.32 | 1.44 | 1.53 | 1.74 | 4.62 |
| 0.1            | 1.32              | 1.32 | 1.30 | 1.22 | 1.79 | 1.47 |
| 0.2            | 0.10              | 0.31 | 0.08 | 0.16 | 0.22 | 0.15 |
| 0.5            | 0.01              | 0.00 | 0.00 | 0.01 | 0.05 | 0.10 |

| <i>kti12</i> $\Delta$ |      |      |      |      |      |      |
|-----------------------|------|------|------|------|------|------|
| 0                     | 1.35 | 1.99 | 2.01 | 2.47 | 3.00 | 3.09 |
| 0.1                   | 1.32 | 1.77 | 1.98 | 2.96 | 2.13 | 2.10 |
| 0.2                   | 0.38 | 0.45 | 0.25 | 0.73 | 0.55 | 0.22 |
| 0.5                   | 0.02 | 0.02 | 0.00 | 0.00 | 0.00 | 0.00 |

| <i>sit4</i> $\Delta$ |      |      |      |      |      |      |
|----------------------|------|------|------|------|------|------|
| 0                    | 0.27 | 0.39 | 0.57 | 0.70 | 0.77 | 1.00 |
| 0.1                  | 0.25 | 0.32 | 0.35 | 0.66 | 1.07 | 0.83 |
| 0.2                  | 0.03 | 0.01 | 0.00 | 0.00 | 0.59 | 0.80 |
| 0.5                  | 0.02 | 0.01 | 0.00 | 0.00 | 0.00 | 0.05 |

| DHS ( $\mu$ M) | % of untreated growth |        |        |        |        |        |
|----------------|-----------------------|--------|--------|--------|--------|--------|
|                | CY4029                |        |        |        |        |        |
| 0              | 100.00                | 100.00 | 100.00 | 100.00 | 100.00 | 100.00 |
| 0.1            | 173.68                | 100.00 | 90.28  | 79.74  | 102.87 | 31.82  |
| 0.2            | 13.42                 | 23.41  | 5.21   | 10.33  | 12.41  | 3.16   |
| 0.5            | 1.45                  | 0.00   | 0.00   | 0.65   | 2.76   | 2.21   |

  

| <i>kti12</i> $\Delta$ |        |        |        |        |        |        |
|-----------------------|--------|--------|--------|--------|--------|--------|
| 0                     | 100.00 | 100.00 | 100.00 | 100.00 | 100.00 | 100.00 |
| 0.1                   | 97.78  | 88.94  | 98.51  | 119.84 | 71.00  | 67.96  |
| 0.2                   | 28.00  | 22.61  | 12.54  | 29.55  | 18.23  | 7.25   |
| 0.5                   | 1.19   | 0.80   | 0.00   | 0.00   | 0.00   | 0.00   |

  

| <i>sit4</i> $\Delta$ |        |        |        |        |        |        |
|----------------------|--------|--------|--------|--------|--------|--------|
| 0                    | 100.00 | 100.00 | 100.00 | 100.00 | 100.00 | 100.00 |
| 0.1                  | 95.09  | 82.44  | 61.95  | 93.46  | 138.96 | 83.00  |
| 0.2                  | 11.32  | 1.78   | 0.00   | 0.00   | 76.36  | 80.30  |
| 0.5                  | 9.06   | 3.05   | 0.00   | 0.00   | 0.00   | 5.00   |

| PHS ( $\mu\text{M}$ ) | OD <sub>600</sub> |      |      |      |      |      |      |
|-----------------------|-------------------|------|------|------|------|------|------|
|                       | CY4029            |      |      |      |      |      |      |
| 0                     | 1.02              | 1.09 | 1.24 | 1.77 | 1.82 | 1.88 | 2.24 |
| 1                     | 0.65              | 1.80 | 2.00 | 1.53 | 1.03 | 1.50 | 1.98 |
| 2                     | 0.65              | 0.68 | 1.90 | 2.39 | 0.76 | 1.78 | 1.85 |
| 3                     | 0.13              | 0.68 | 0.92 | 1.71 | 0.73 | 0.92 | 1.41 |
| 4                     | 0.08              | 0.49 | 0.80 | 0.84 | 0.14 | 0.86 | 1.46 |
| 5                     | 0.04              | 0.35 | 0.70 | 0.73 | 0.05 | 0.91 | 2.87 |
| 6                     | 0.02              | 0.32 | 0.84 | 0.65 | 0.03 | 0.72 | 0.60 |

| <i>kti12</i> $\Delta$ |      |      |      |      |      |      |      |
|-----------------------|------|------|------|------|------|------|------|
| 0                     | 0.68 | 0.82 | 0.85 | 0.92 | 0.94 | 2.37 | 2.73 |
| 1                     | 0.36 | 0.75 | 0.66 | 0.95 | 0.50 | 2.63 | 3.48 |
| 2                     | 0.28 | 0.91 | 0.73 | 0.79 | 0.41 | 2.00 | 2.77 |
| 3                     | 0.20 | 0.54 | 0.52 | 0.70 | 0.36 | 2.22 | 2.63 |
| 4                     | 0.26 | 0.52 | 0.44 | 1.03 | 0.25 | 1.72 | 2.35 |
| 5                     | 0.14 | 0.33 | 0.41 | 0.31 | 0.22 | 1.91 | 1.93 |
| 6                     | 0.14 | 0.10 | 0.37 | 0.10 | 0.25 | 1.70 | 1.82 |

| <i>sit4</i> $\Delta$ |      |      |      |      |      |      |      |
|----------------------|------|------|------|------|------|------|------|
| 0                    | 0.41 | 0.42 | 0.47 | 0.69 | 0.70 | 0.72 | 0.77 |
| 1                    | 0.56 | 0.42 | 0.44 | 0.68 | 0.80 | 0.65 | 0.72 |
| 2                    | 0.43 | 0.41 | 0.38 | 0.67 | 0.74 | 0.61 | 0.71 |
| 3                    | 0.44 | 0.38 | 0.34 | 0.63 | 0.84 | 0.55 | 0.68 |
| 4                    | 0.40 | 0.40 | 0.37 | 0.69 | 0.74 | 0.58 | 0.96 |
| 5                    | 0.51 | 0.40 | 0.58 | 0.65 | 0.79 | 0.58 | 0.68 |
| 6                    | 0.62 | 0.39 | 0.42 | 0.67 | 0.79 | 0.67 | 0.65 |

|   |      |      |      |
|---|------|------|------|
| 0 | 0.79 | 0.92 | 0.92 |
| 1 | 0.25 | 0.83 | 0.85 |
| 2 | 0.42 | 0.85 | 0.82 |
| 3 | 0.35 | 0.87 | 0.85 |
| 4 | 0.13 | 0.82 | 0.88 |
| 5 | 0.05 | 0.88 | 0.82 |
| 6 | 0.09 | 1.02 | 0.84 |

**% of untreated growth****PHS ( $\mu$ M)****CY4029**

|          |        |        |        |        |        |        |        |
|----------|--------|--------|--------|--------|--------|--------|--------|
| <b>0</b> | 100.00 | 100.00 | 100.00 | 100.00 | 100.00 | 100.00 | 100.00 |
| <b>1</b> | 63.92  | 165.14 | 161.29 | 86.44  | 56.76  | 79.79  | 88.39  |
| <b>2</b> | 63.53  | 62.29  | 153.23 | 135.03 | 40.11  | 94.68  | 82.59  |
| <b>3</b> | 12.25  | 62.11  | 73.79  | 96.61  | 40.12  | 49.15  | 62.95  |
| <b>4</b> | 7.75   | 44.77  | 64.52  | 47.46  | 7.69   | 45.48  | 65.18  |
| <b>5</b> | 3.53   | 31.65  | 56.69  | 41.07  | 2.86   | 48.56  | 128.13 |
| <b>6</b> | 1.96   | 29.72  | 67.58  | 36.89  | 1.81   | 38.24  | 26.79  |

***kti12*  $\Delta$** 

|          |        |        |        |        |        |        |        |
|----------|--------|--------|--------|--------|--------|--------|--------|
| <b>0</b> | 100.00 | 100.00 | 100.00 | 100.00 | 100.00 | 100.00 | 100.00 |
| <b>1</b> | 52.50  | 90.63  | 77.29  | 103.05 | 53.09  | 110.97 | 127.47 |
| <b>2</b> | 40.44  | 110.71 | 85.76  | 86.04  | 43.19  | 84.39  | 101.47 |
| <b>3</b> | 29.41  | 66.55  | 60.82  | 76.66  | 37.77  | 93.67  | 96.34  |
| <b>4</b> | 37.79  | 62.90  | 51.65  | 112.43 | 26.81  | 72.57  | 86.08  |
| <b>5</b> | 20.00  | 40.15  | 47.76  | 33.59  | 22.87  | 80.59  | 70.70  |
| <b>6</b> | 19.85  | 12.29  | 43.65  | 10.69  | 26.60  | 71.73  | 66.67  |

***sit4*  $\Delta$** 

|          |        |        |        |        |        |        |        |
|----------|--------|--------|--------|--------|--------|--------|--------|
| <b>0</b> | 100.00 | 100.00 | 100.00 | 100.00 | 100.00 | 100.00 | 100.00 |
| <b>1</b> | 137.16 | 100.95 | 94.02  | 97.68  | 114.90 | 90.93  | 93.39  |
| <b>2</b> | 105.87 | 97.14  | 80.77  | 96.24  | 106.59 | 85.50  | 91.57  |
| <b>3</b> | 106.36 | 91.65  | 71.58  | 90.59  | 119.63 | 76.01  | 87.81  |
| <b>4</b> | 98.04  | 94.75  | 78.21  | 99.57  | 105.87 | 80.75  | 124.90 |
| <b>5</b> | 123.47 | 94.75  | 123.72 | 93.63  | 113.04 | 80.20  | 87.81  |
| <b>6</b> | 151.10 | 93.56  | 90.38  | 96.96  | 112.75 | 93.44  | 83.92  |

|          |        |        |        |
|----------|--------|--------|--------|
| <b>0</b> | 100.00 | 100.00 | 100.00 |
| <b>1</b> | 31.81  | 89.50  | 92.42  |
| <b>2</b> | 52.85  | 80.95  | 88.20  |
| <b>3</b> | 44.74  | 94.05  | 91.45  |
| <b>4</b> | 16.86  | 88.31  | 95.24  |
| <b>5</b> | 5.83   | 95.13  | 88.32  |
| <b>6</b> | 11.91  | 110.71 | 101.95 |
